# Supplementary material for: Tuning lipophilicity for optimizing the H2S sensing performance of coumarin–merocyanine derivatives
Source: Royal Society of Chemistry journal article supplement (doi:10.1039/c9nj03846a), 2019-01-01
Supplement: c9nj03846a1.pdf [file c9nj03846a1.pdf]

## Supporting Information

### **Tuning lipophilicity for optimizing H<sub>2</sub>S sensing performance of coumarin-merocyanine derivatives**

Hongbao Fang, Yuncong Chen\*, Xiangchao Shi, Yang Bai, Zhongyan Chen, Zhong Han, Yuming Zhang, Weijiang He\* and Zijian Guo

State Key Laboratory of Coordination Chemistry, School of Chemistry and Chemical Engineering, Nanjing University, Nanjing, Jiangsu 210023, China.

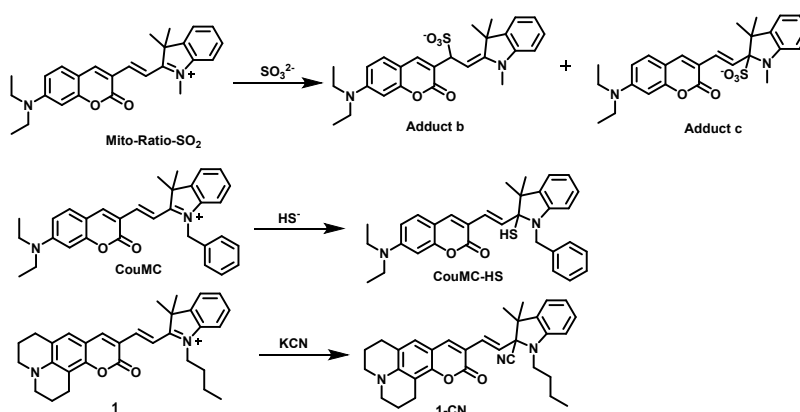

**Scheme S1** Three example compounds based on the nucleophilic addition

## Synthesis and characterizations

### Synthetic procedures

Compounds **1** and **2** were synthesized following by the previously reported literatures. [1]

#### Synthesis of 7-diethylaminocoumarin (**1**)

3.3 g diethyl malonate (20 mmol) and 1 mL piperidine (10 mmol) were mixed and added to the solution of 1.93 g 4-(Diethylamino)-salicylaldehyde (10 mmol) dissolved in 30 mL absolute ethanol. After stirring and heating to reflux for 6 hours, the solvent was removed by rotate evaporating. And then 20.0 mL concentrated HCl and 20.0 mL acetic acid were added for hydrolysis and stirred thoroughly for another 6 hours. After the mixture cooled down to room temperature, 100 mL ice water were poured into the solution and then 40% NaOH solution was added dropwise to adjust pH to ~5, and pale precipitate was produced immediately. After stirring for another 30 min, the mixture was filtered, washed with water and then recrystallized with toluene, dried by vacuum drying oven to give **1** (1.63 g, 7.5 mmol) in 75% yield.

#### Synthesis of 7-diethylaminocoumarin-3-aldehyde (**2**)

2 mL dry DMF was added dropwise to 2 mL POCl<sub>3</sub> at ice bath with N<sub>2</sub> atmosphere and stirred for 30 minutes at 50 °C to yield a red solution. And then **1** (1.50 g, 6.91 mmol) dissolved in 10 mL DMF was added to the solution to yield a scarlet suspension. The mixture was stirred and heated to 60 °C for 12 h, then added to 100 mL ice water. 20% NaOH solution was added to adjust the pH of the mixture to yield a large amount of precipitate. The mixture was filtered, washed with water for 3 times, recrystallized in absolute ethanol and dried by vacuum drying oven to give **2** (1.11 g, 4.52 mmol) in 65.5% yield. <sup>1</sup>H NMR (300 MHz, Chloroform-*d*) δ 10.13 (s, 1H), 8.26 (s, 1H), 7.41 (d, J = 9.0 Hz, 1H), 6.64 (dd, J = 9.0, 2.5 Hz, 1H), 6.49 (d, J = 2.3 Hz, 1H), 3.48 (q, J = 7.1 Hz, 4H), 1.26 (t, J = 7.1 Hz, 6H).

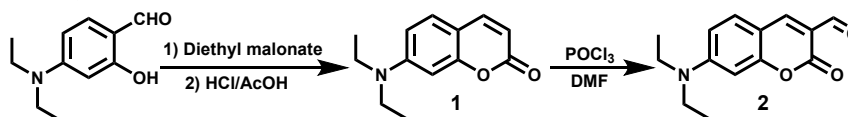

**Scheme S2** The synthesis of 7-diethylaminocoumarin-3-aldehyde (**2**)

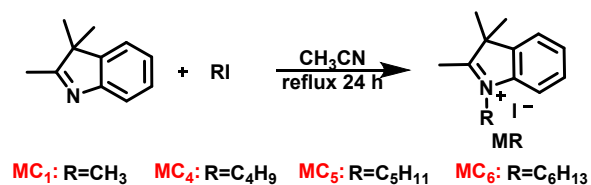

**Scheme S3** The synthesis of the indole derivatives (**MR**)

**CM-NC<sub>1</sub>**, 56%. <sup>1</sup>H NMR (300 MHz, Chloroform-*d*) δ 10.05 (s, 1H), 8.59 (d, *J* = 15.9 Hz, 1H), 8.11 (d, *J* = 9.1 Hz, 1H), 8.01 (d, *J* = 15.9 Hz, 1H), 7.69 – 7.37 (m, 4H), 6.71 (dd, *J* = 9.1, 2.4 Hz, 1H), 6.47 (d, *J* = 2.2 Hz, 1H), 4.31 (s, 3H), 3.52 (q, *J* = 7.1 Hz, 4H), 1.84 (s, 7H), 1.29 (t, *J* = 7.1 Hz, 6H). <sup>13</sup>C NMR (75 MHz, Chloroform-*d*) δ 181.17, 160.99, 158.75, 154.48, 150.66, 149.39, 142.64, 141.50, 134.38, 129.25, 128.63, 122.49, 113.26, 112.48, 110.96, 108.92, 96.77, 77.37, 76.95, 76.52, 51.58, 45.58, 35.94, 27.41, 12.53. HRMS (positive mode, *m/z*): Calcd. 401.2224, found 401. 2226 for [M]<sup>+</sup>.

**CM-NC<sub>4</sub>**, 48.9%. <sup>1</sup>H NMR (300 MHz, DMSO-*d*<sub>6</sub>) δ 8.80 (d, *J* = 4.3 Hz, 1H), 8.30 (d, *J* = 15.7 Hz, 1H), 8.11 – 7.74 (m, 3H), 7.59 (dd, *J* = 9.7, 4.0 Hz, 3H), 6.92 (dd, *J* = 9.1, 2.2 Hz, 1H), 6.71 (d, *J* = 1.9 Hz, 1H), 4.45 (t, *J* = 7.2 Hz, 2H), 3.58 (q, *J* = 7.0 Hz, 4H), 1.93 – 1.71 (m, 6H), 1.44 (dd, *J* = 15.2, 7.4 Hz, 2H), 1.19 (t, *J* = 7.0 Hz, 6H), 0.96 (t, *J* = 7.3 Hz, 3H). <sup>13</sup>C NMR (75 MHz, DMSO-*d*<sub>6</sub>) δ 181.08, 159.69, 158.01, 154.43, 151.11, 150.54, 143.60, 141.32, 132.81, 129.39, 128.95, 123.34, 114.90, 112.61, 111.73, 110.03, 109.84, 96.90, 51.79, 46.40, 45.23, 40.72, 40.44, 40.16, 39.88, 39.60, 39.33, 39.05, 30.13, 26.55, 19.90, 13.94, 12.86. HRMS (positive mode, *m/z*): Calcd. 443.2693, found 443. 2695 for [M]<sup>+</sup>.

**CM-NC<sub>5</sub>**, 58.3%. <sup>1</sup>H NMR (400 MHz, Chloroform-*d*) δ 10.15 (s, 1H), 8.63 (d, *J* = 15.8 Hz, 1H), 8.14 (d, *J* = 9.0 Hz, 1H), 8.06 (d, *J* = 15.8 Hz, 1H), 7.59 – 7.47 (m, 3H), 7.44 – 7.39 (m, 1H), 6.69 (dd, *J* = 9.1, 2.5 Hz, 1H), 6.45 (d, *J* = 2.4 Hz, 1H), 4.75 (s, 1H), 3.52 (q, *J* = 7.1 Hz, 4H), 2.02 – 1.90 (m, 2H), 1.88 (s, 6H), 1.60 – 1.47 (m, 2H), 1.45 – 1.35 (m, 2H), 1.28 (t, *J* = 7.1 Hz, 6H), 0.91 (t, *J* = 7.3 Hz, 3H). <sup>13</sup>C NMR (101 MHz, Chloroform-*d*) δ 180.99, 161.10, 158.77, 154.55, 151.22, 143.31, 140.88, 134.50, 129.22, 128.62, 122.79, 113.36, 112.58, 111.05, 110.92, 108.95, 96.72, 51.75, 47.28, 45.62, 28.79, 28.30, 27.75, 22.39, 13.84, 12.62. HRMS (positive mode, *m/z*): Calcd. 457.2850, found 457.2854 for [M]<sup>+</sup>.

**CM-NC<sub>6</sub>**, 42.1%. <sup>1</sup>H NMR (300 MHz, Chloroform-*d*) δ 10.10 (s, 1H), 8.63 (d, *J* = 15.8 Hz, 1H), 8.20 – 8.01 (m, 2H), 7.65 – 7.48 (m, 3H), 7.47 – 7.35 (m, 1H), 6.69 (dd, *J* = 9.1, 2.2 Hz, 1H), 6.45

(d,  $J = 2.2$  Hz, 1H), 3.52 (q,  $J = 7.1$  Hz, 4H), 2.06 – 1.90 (m, 2H), 1.88 (s, 6H), 1.61 – 1.48 (m, 2H), 1.38 – 1.20 (m, 10 H), 0.86 (t,  $J = 6.9$  Hz, 3H).  $^{13}\text{C}$  NMR (75 MHz, Chloroform- $d$ )  $\delta$  180.94, 160.96, 158.64, 154.45, 151.17, 150.50, 143.21, 140.78, 134.36, 129.15, 128.55, 122.70, 113.32, 112.53, 110.92, 110.83, 108.95, 96.62, 77.40, 77.18, 76.97, 76.55, 51.65, 47.17, 45.52, 31.27, 28.43, 27.63, 26.32, 22.26, 13.87, 12.52. HRMS (positive mode,  $m/z$ ): Calcd. 471.3006, found 471.3008 for  $[\text{M}]^+$ .

## Supporting figures

### Fluorescence and UV/vis response time for $\text{H}_2\text{S}$

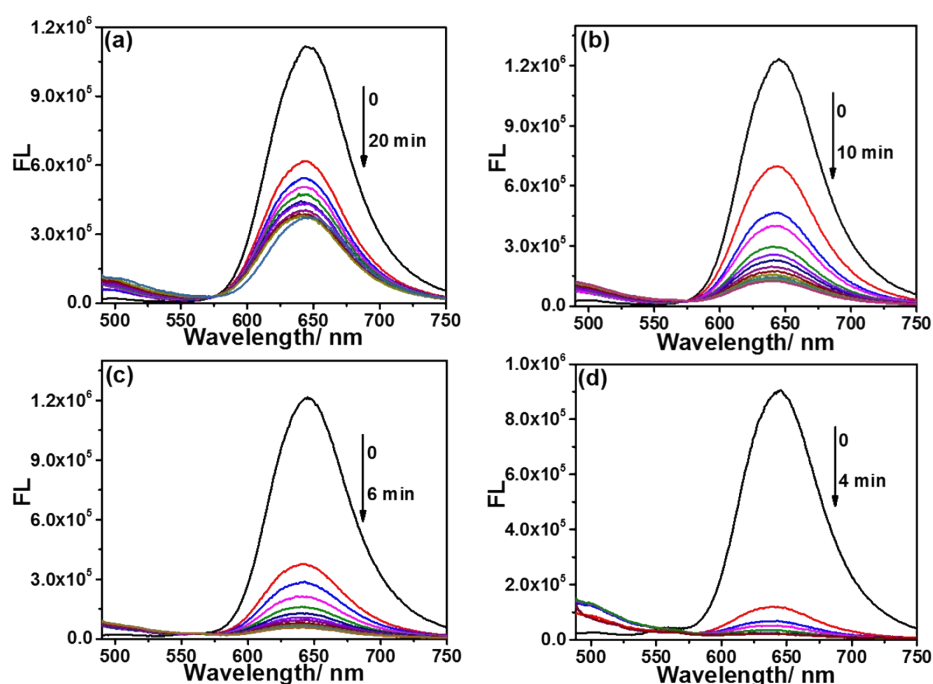

**Figure S1** (a-d) Fluorescence spectra changes of **CM-NC<sub>1</sub>** (a), **CM-NC<sub>4</sub>**(b), **CM-NC<sub>5</sub>**(c) and **CM-NC<sub>6</sub>** (d) (10  $\mu\text{M}$ ) in PBS solution (20 mM, pH 7.40, 2% DMSO, v/v) with the addition of 200  $\mu\text{M}$  NaHS over time,  $\lambda_{\text{ex}}=475$  nm.

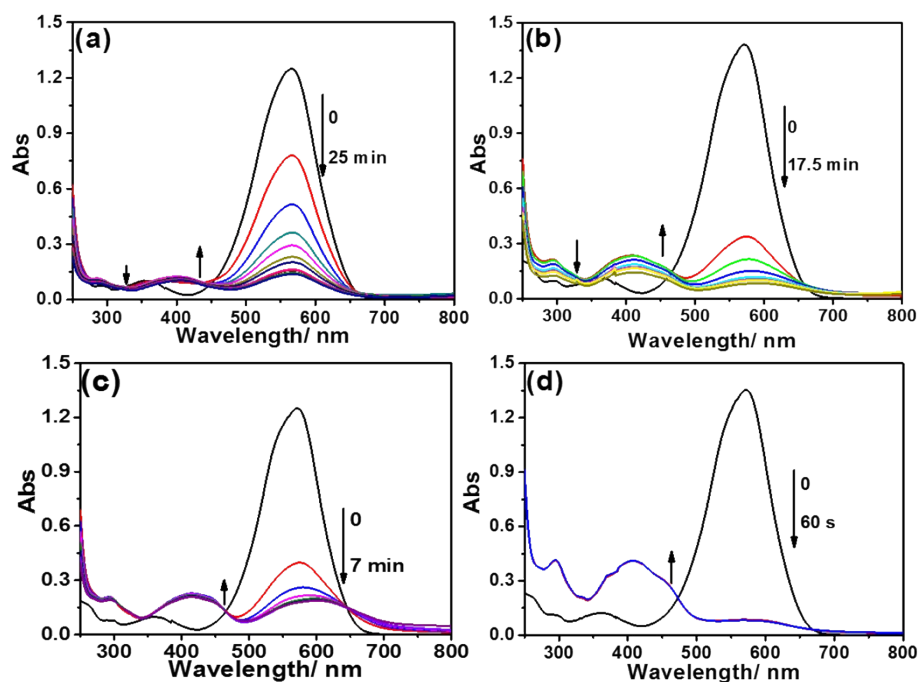

**Figure S2** (a-d) Absorption spectra changes of **CM-NC<sub>1</sub>**(a), **CM-NC<sub>4</sub>**(b), **CM-NC<sub>5</sub>**(c) and **CM-NC<sub>6</sub>**(d) (20  $\mu$ M) in PBS solution (20 mM, pH 7.40, 2% DMSO, v/v) with the addition of 400  $\mu$ M NaHS over time.

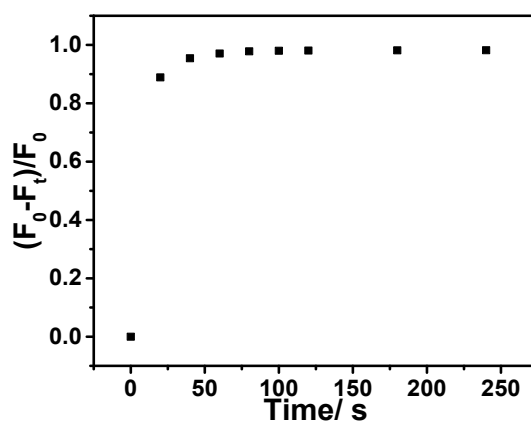

**Figure S3** Fluorescence change rate curve at 650 nm ( $F_0-F_t$ )/ $F_0$  of 10  $\mu$ M **CM-NC<sub>6</sub>** in PBS buffer (20 mM, pH=7.4, 2% DMSO, v/v) in the presence of 200  $\mu$ M NaHS,  $\lambda_{ex}$ = 475 nm.

### Detection Limit of Probe **CM-NC<sub>6</sub>** for HS<sup>-</sup>

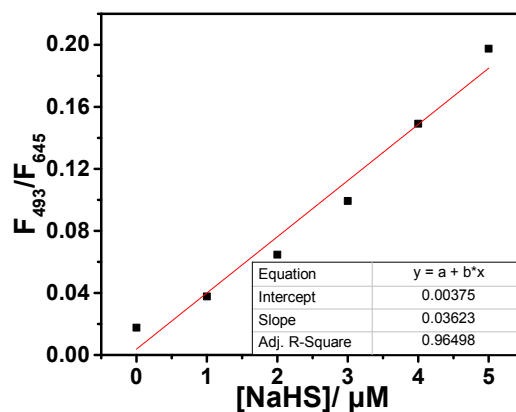

**Figure S4** Fluorescence intensity ratio at 493 nm and 645 nm ( $F_{493}/F_{645}$ ) of 10  $\mu\text{M}$  **CM-NC<sub>6</sub>** as a function of the different NaHS concentration.  $\lambda_{\text{ex}} = 475$  nm.

### MCF-7 cell imaging

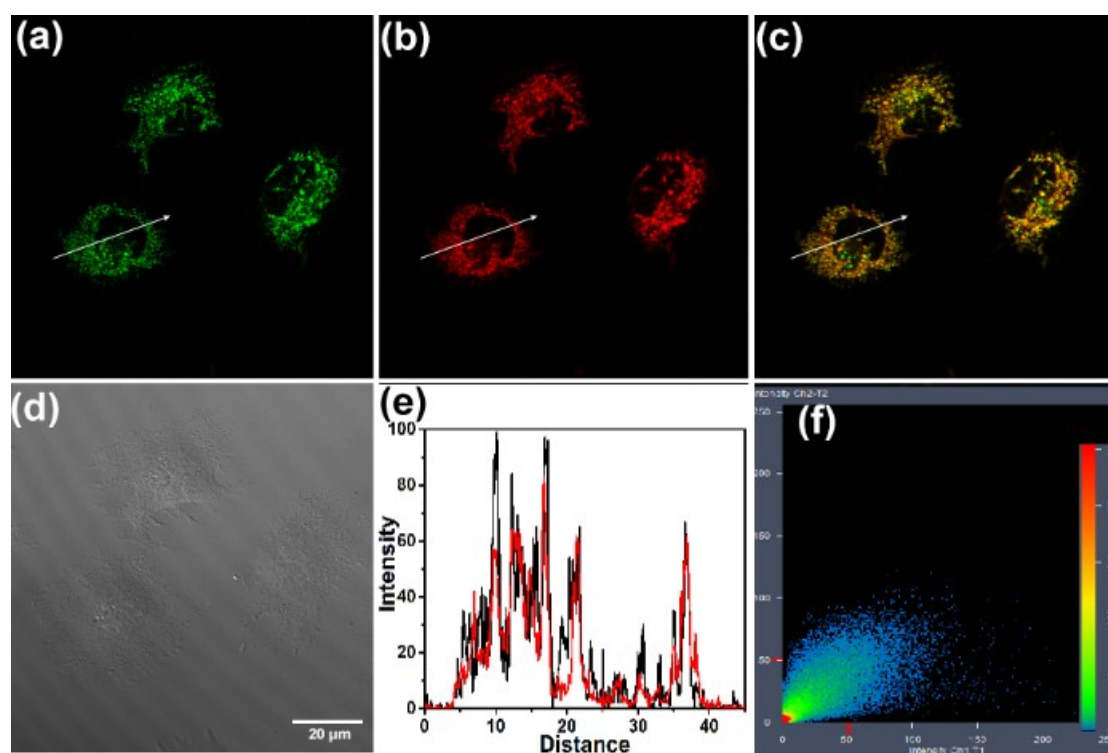

**Figure S5** (a-c) Confocal images of MCF-7 cells incubated with **CM-NC<sub>1</sub>** (5  $\mu\text{M}$ , 15 min) and Mitotracker Deep Red 633 (1  $\mu\text{M}$ , 15 min). (a) The green channel image obtained with 488 nm excitation; (b) The red channel image of Mitotracker Deep Red 633 collected with 633 nm excitation; (c) overlay of (a) and (b); (d) Bright-field image of MCF-7 cells; (e) the intensity profile of the linear region of the interest (white arrow) across the MCF-7 cells co-incubated with Mitotracker Deep Red 633 and **CM-NC<sub>1</sub>**; and (f) correlation plot of **CM-NC<sub>1</sub>** and Mitotracker Deep Red 633 intensities. Scale bar = 20  $\mu\text{m}$ .

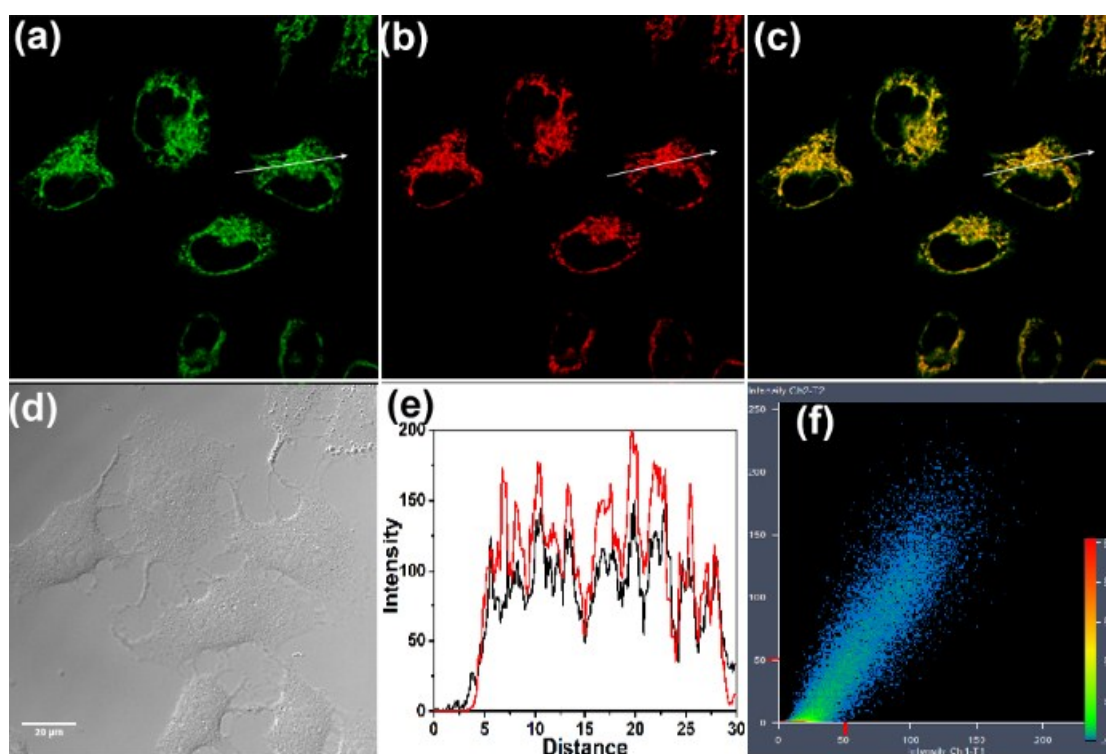

**Figure S6** (a-c) Confocal images of MCF-7 cells incubated with **CM-NC<sub>4</sub>** (5 μM, 15 min) and Mitotracker Deep Red 633 (1 μM, 15 min). (a) The green channel image obtained with 488 nm excitation; (b) The red channel image of Mitotracker Deep Red 633 collected with 633 nm excitation; (c) overlay of (a) and (b); (d) Bright-field image of MCF-7 cells; (e) the intensity profile of the linear region of the interest (white arrow) across the MCF-7 cells co-incubated with Mitotracker Deep Red 633 and **CM-NC<sub>4</sub>**; and (f) correlation plot of **CM-NC<sub>4</sub>** and Mitotracker Deep Red 633 intensities. Scale bar = 20 μm.

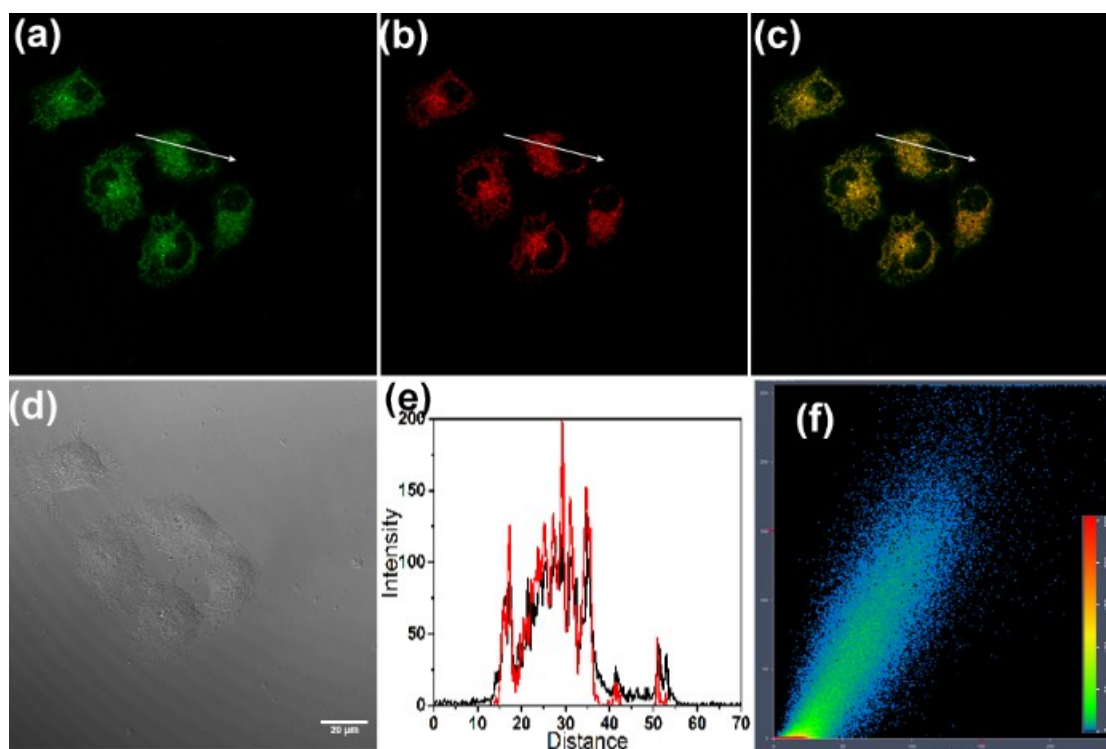

**Figure S7** (a-c) Confocal fluorescence images of MCF-7 cells incubated with **CM-NC<sub>5</sub>** (5 μM, 15 min) and Mitotracker Deep Red 633 (1 μM, 15 min). (a) The green channel image obtained with 488 nm excitation; (b) The red channel image of Mitotracker Deep Red 633 collected with 633 nm excitation; (c) overlay of (a) and (b); (d) Bright-field image of MCF-7 cells; (e) the intensity profile of the linear region of the interest (white arrow) across the MCF-7 cells co-incubated with Mitotracker Deep Red 633 and **CM-NC<sub>5</sub>**; and (f) correlation plot of **CM-NC<sub>5</sub>** and Mito-marker Deep Red 633 intensities. Scale bar = 20 μm.



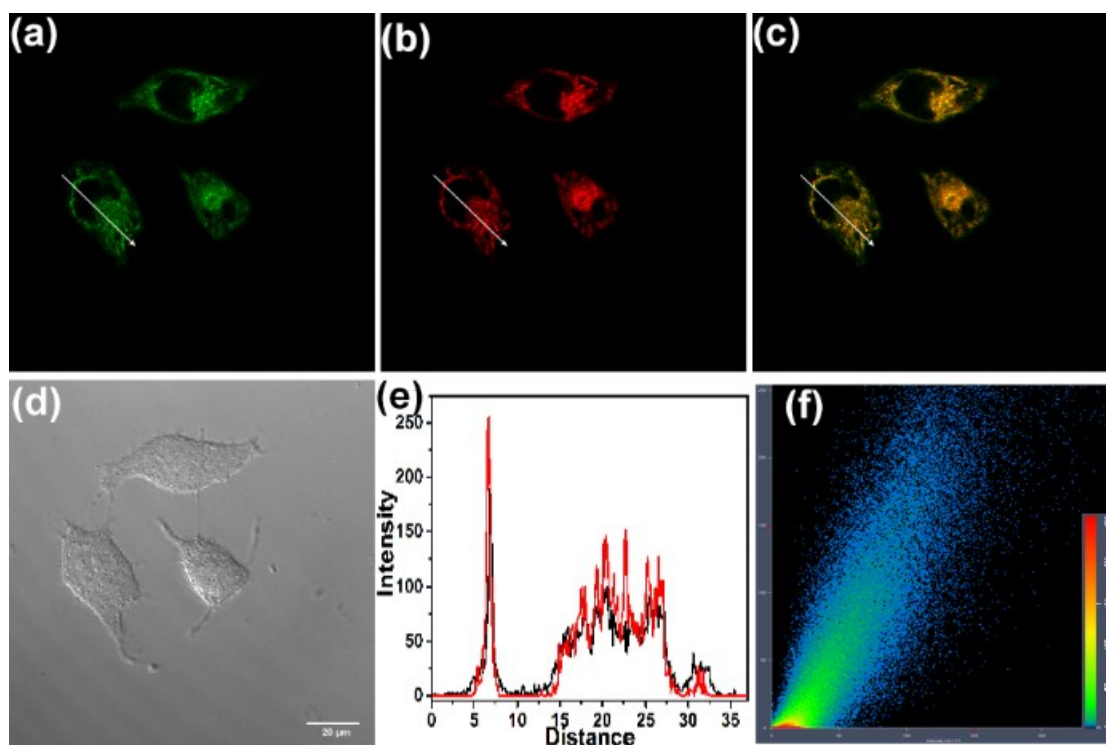

**Figure S8** (a-c) Confocal images of MCF-7 cells incubated with **CM-NC<sub>6</sub>** (5  $\mu$ M, 15 min) and Mitotracker Deep Red 633 (1  $\mu$ M, 15 min). (a) The green channel image obtained with 488 nm excitation; (b) The red channel image of Mitotracker Deep Red 633 collected with 633 nm excitation; (c) Overlay of (a) and (b); (d) Bright-field image of MCF-7 cells; (e) The intensity profile of the linear region of the interest (white arrow) across the MCF-7 cells co-incubated with Mitotracker Deep Red 633 and **CM-NC<sub>6</sub>**; and (f) correlation plot of **CM-NC<sub>6</sub>** and Mitotracker Deep Red 633 intensities. Scale bar = 20  $\mu$ m.

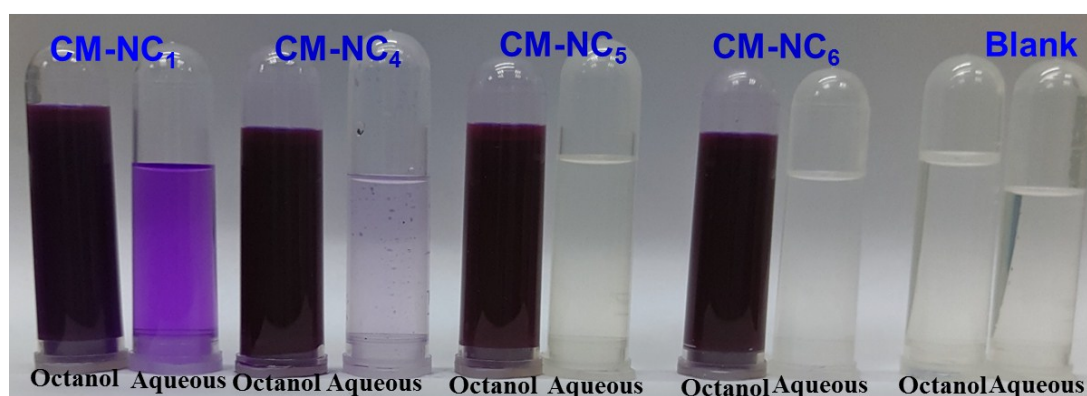

**Figure S9** Photograph of **CMC** Octanol-aqueous buffer partition

# $^1\text{H}$ and $^{13}\text{C}$ NMR spectra

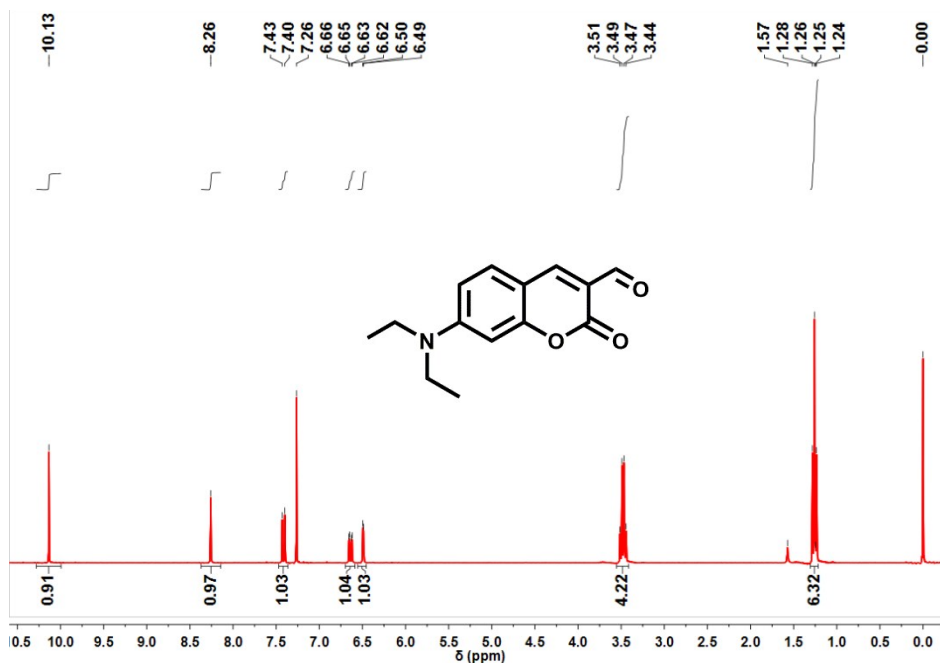

Figure S10  $^1\text{H}$  NMR spectrum of **2** (Chloroform-*d*, 300 MHz)

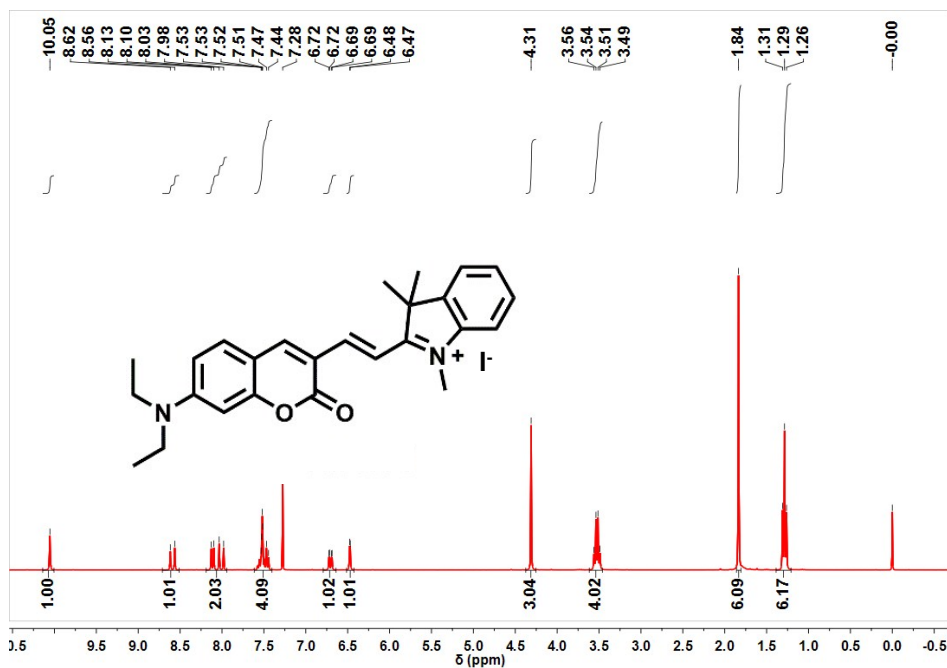

Figure S11  $^1\text{H}$  NMR spectrum of **CM-NC<sub>1</sub>** (Chloroform-*d*, 300 MHz)

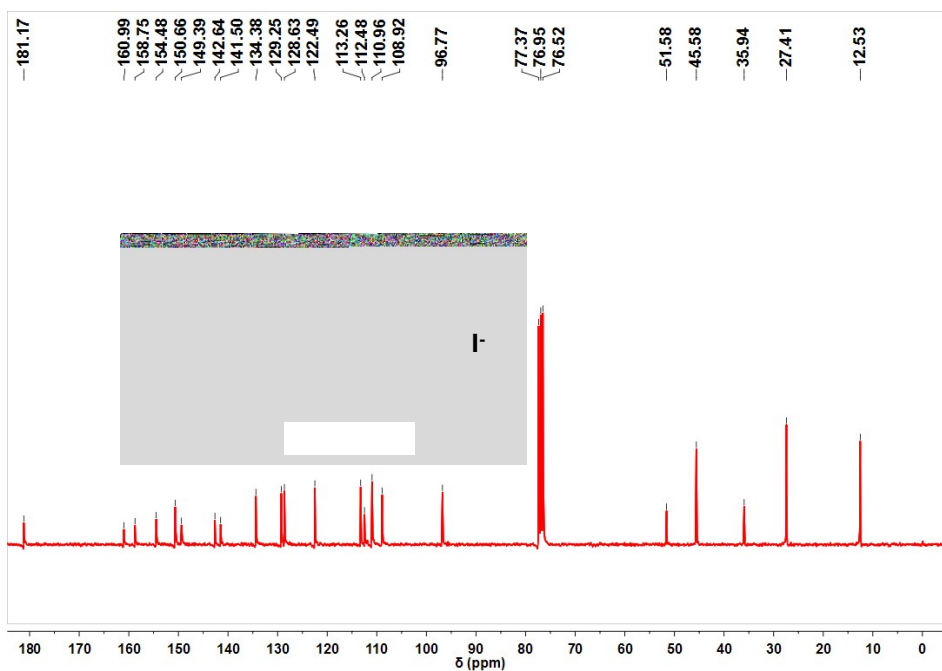

Figure S12  $^{13}\text{C}$  NMR spectrum of CM-NC<sub>1</sub> (Chloroform-*d*, 75 MHz)

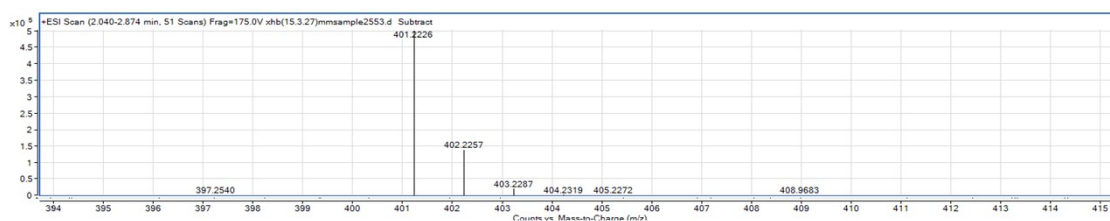

Figure S13 HRMS Spectrum of CM-NC<sub>1</sub>

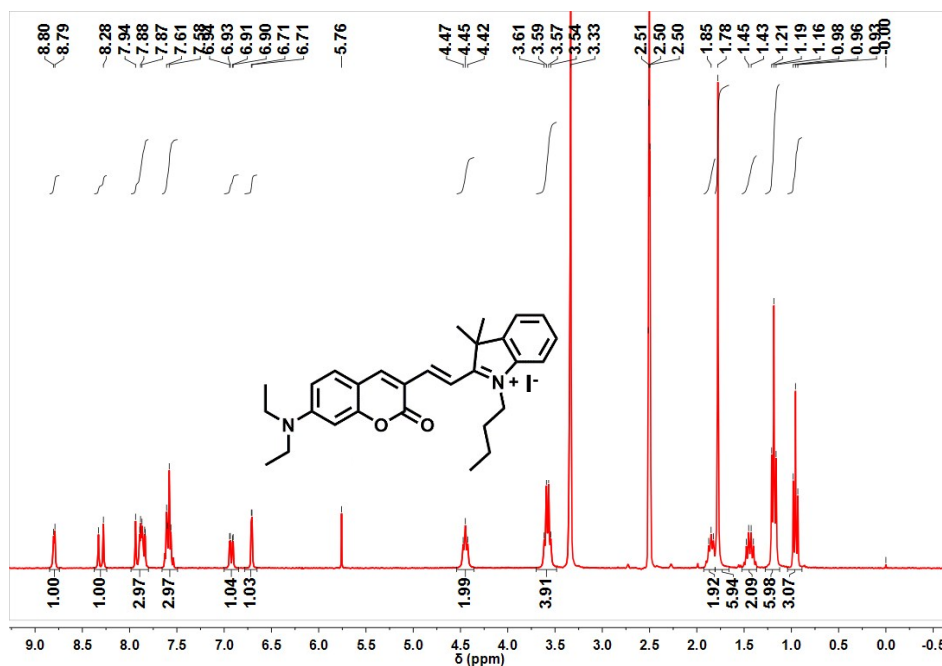

Figure S14  $^1\text{H}$  NMR spectrum of CM-NC<sub>4</sub> (DMSO-*d*<sub>6</sub>, 300 MHz)

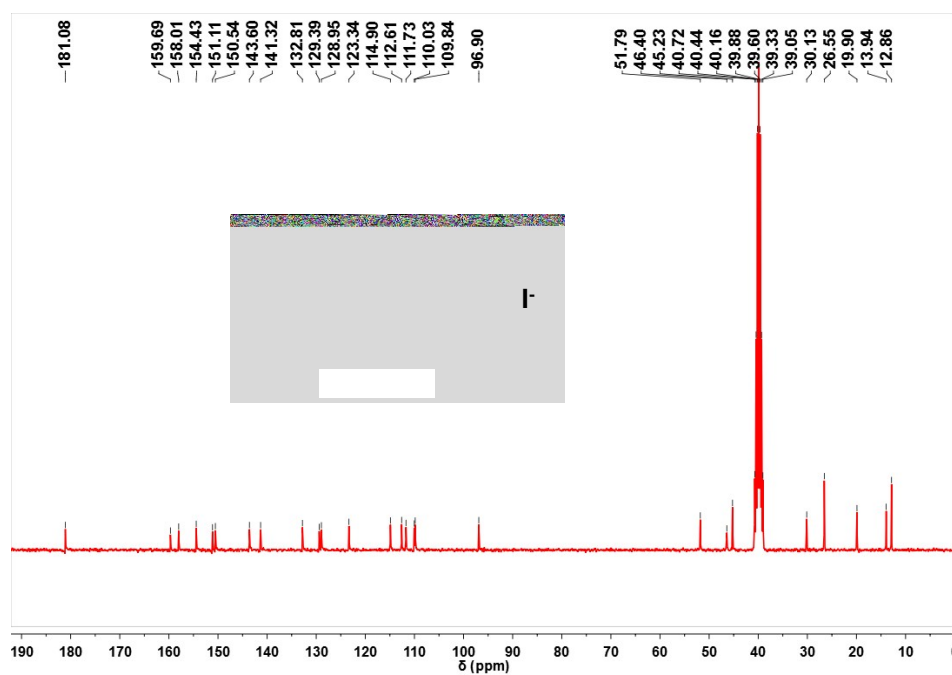

Figure S15  $^{13}\text{C}$  NMR of CM-NC<sub>4</sub> (DMSO-*d*<sub>6</sub>, 75 MHz)

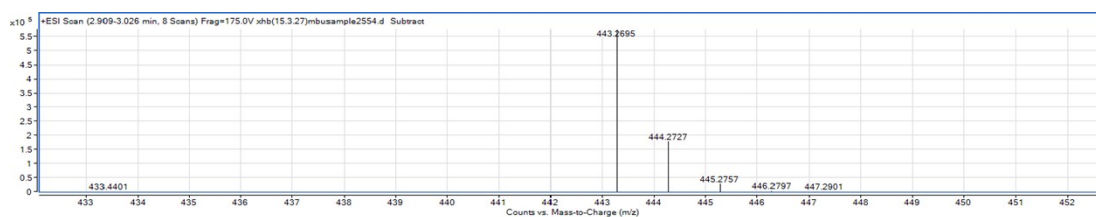

Figure S16 HRMS Spectrum of CM-NC<sub>4</sub>

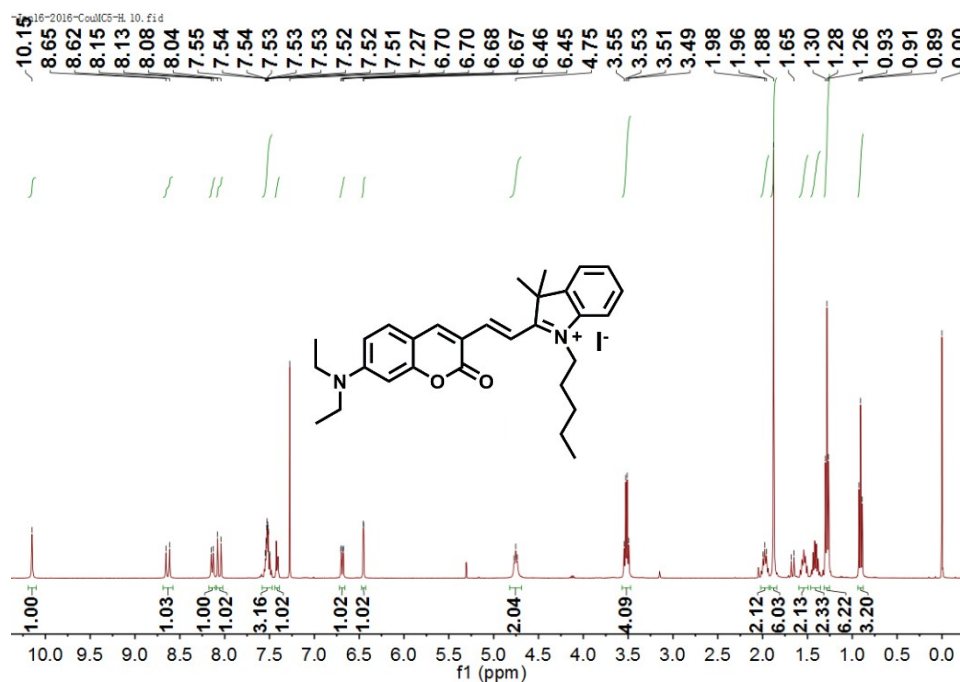

Figure S17  $^1\text{H}$  NMR spectrum of CM-NC<sub>5</sub> (Chloroform-*d*, 400 MHz)

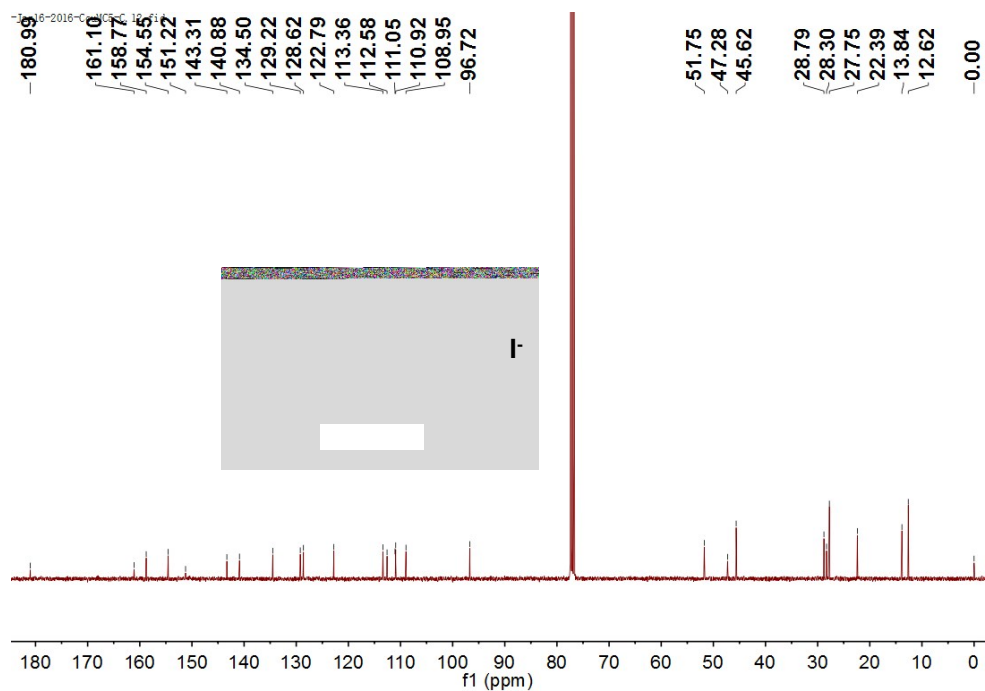

Figure S18  $^{13}\text{C}$  NMR spectrum of CM-NC<sub>5</sub> (Chloroform-*d*, 101 MHz)

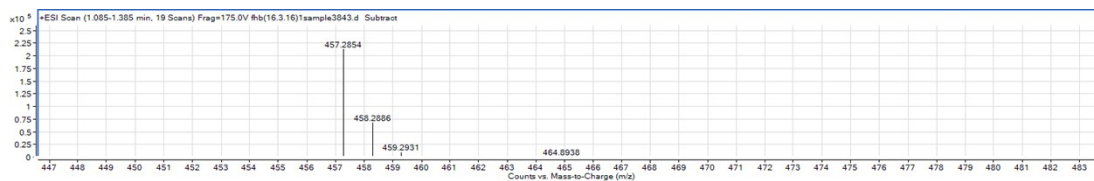

Figure S19 HRMS of CM-NC<sub>5</sub>

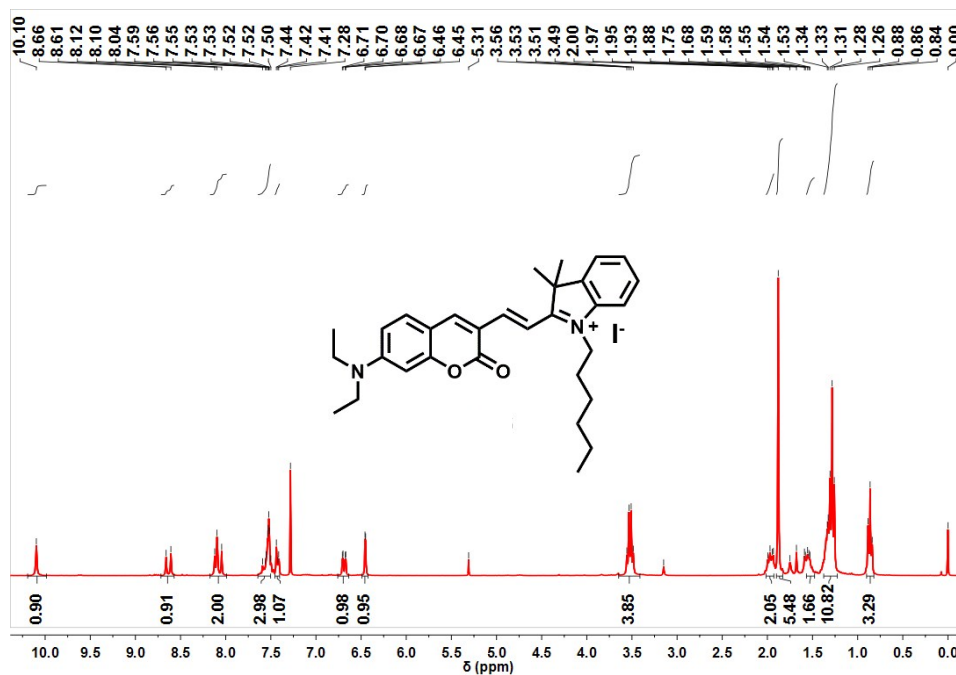

Figure S20  $^1\text{H}$  NMR spectrum of CM-NC<sub>6</sub> (Chloroform-*d*, 300 MHz)

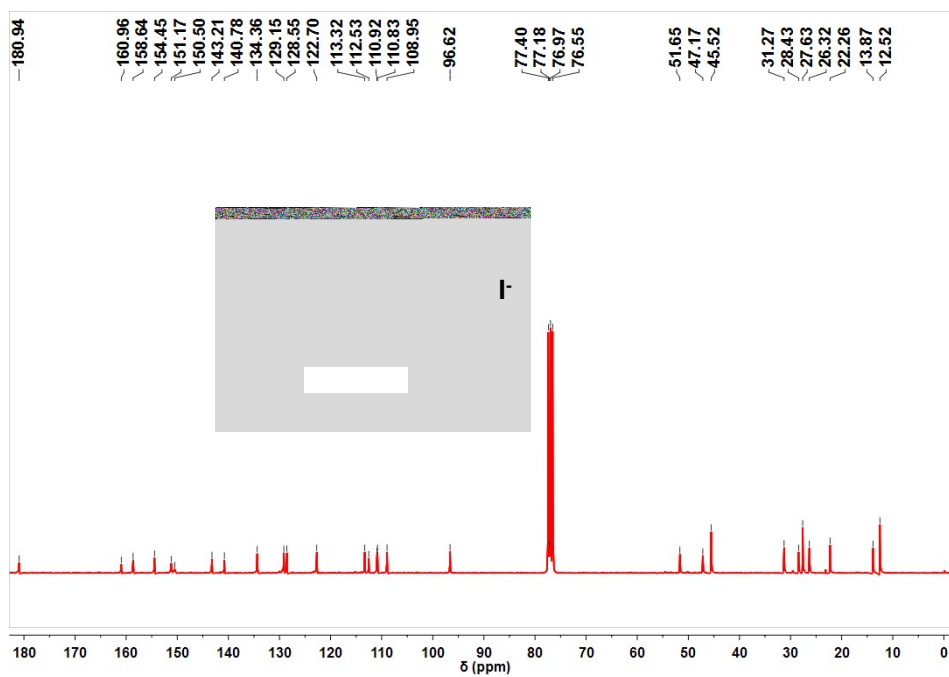

**Figure S21**  $^{13}\text{C}$  NMR spectrum of CM-NC<sub>6</sub> (Chloroform-*d*, 75 MHz)

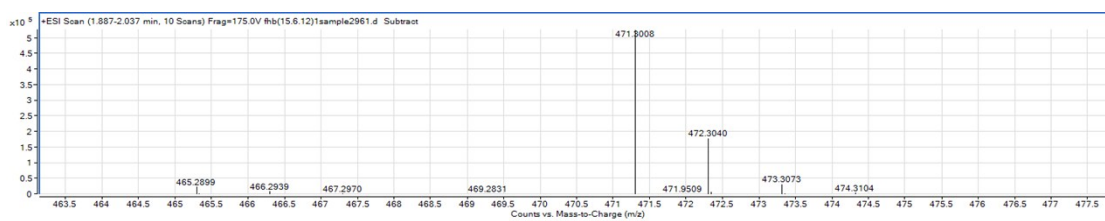

**Figure S22** HRMS of CM-NC<sub>6</sub>

## Reference

- 1 J. Wu, W. Liu, X. Zhuang, F. Wang, P. Wang, S. Tao, X. Zhang, Wu S., S. Lee, *Org. Lett.* 2007, **9**, 33.
